# Supplementary material for: Assessing the Biological Significance of Gene Expression Signatures and Co-Expression Modules by Studying Their Network Properties
Source: PLoS One. 2011 Mar 7;6(3):e17474. doi: 10.1371/journal.pone.0017474 (PMC3049771; doi:10.1371/journal.pone.0017474)
Supplement: File S2 — Coexpression modules parameters. Excel file containing all the coexpression modules analysed with the values of the four network parameters. (XLS) [file pone.0017474.s002.xls]

## Sheet: modules_matrix_parameters_values_mean.txt
### Assesing the biological significance of gene expression signatures and co-expression modules by studying their network properties. (Pablo Minguez and Joaquin Dopazo)
### Results for the MODULES.
### All modules in this file where downloaded from L2L database (http://depts.washington.edu/l2l/)
### The pvalues correspond to the assessment of each parameter distribution against a reference distribution
### The test direction indicates the direction for the interpretation of the test results:
### < means list distribution is smaller than the reference distribution with the given pvalue
### > means list distribution is greater than the reference distribution with the given pvalue
#Module_id	Connections degree (mean)	Connections degree (pvalue)	Connections degree (test direction)	Betweenness (mean)	Betweenness (pvalue)	Betweeness (test direction)	Clustering coefficient (mean)	Clustering coefficient (pvalue)	Clustering coefficient (test direction)	Number of components (mean)
module_262	1.2381	0.0001	>	0.0121581	0.0261	>	0.0793651	0.1175	>	0.428571
module_91	2.87805	<0.001	>	0.0261772	<0.001	>	0.170463	<0.001	>	0.146341
module_520	0.5	0.1679	>	0.00657895	0.8153	>	0	1	>	0.75
module_21	2	0.005	>	0.0140977	0.2096	>	0.285714	0.0009	>	0.5
module_550	0	0.8058	<	0	0.943	<	0	NA	NA	1
module_178	1.92593	<0.001	>	0.00527462	<0.001	>	0.191358	0.0001	>	0.333333
module_292	1.72857	<0.001	>	0.00191514	<0.001	>	0.0447619	0.0623	>	0.342857
module_132	1	0.0006	>	0.00314465	0.5586	>	0	0.9996	<	0.5
module_423	0	0.9802	<	0	0.9942	<	0	NA	NA	1
module_486	0.923077	0.0426	>	0.00057438	0.3371	>	0	0.9942	<	0.576923
module_116	0.818182	0.0449	>	0.00305944	0.2194	>	0	0.9989	<	0.590909
module_85	2.06154	<0.001	>	0.0282026	<0.001	>	0	0.9928	<	0.184615
module_475	0	0.8233	<	0	0.9485	<	0	NA	NA	1
module_146	1.6383	0.0002	>	0.00242571	0.0236	>	0.0561466	0.2667	>	0.37234
module_329	1.56962	<0.001	>	0.000341658	0.0015	>	0	0.9364	<	0.379747
module_239	1.57764	<0.001	>	0.00409797	0.0001	>	0.0126294	0.8521	>	0.341615
module_401	0	0.8233	<	0	0.9485	<	0	NA	NA	1
module_284	1.19298	<0.001	>	0.000581753	0.0104	>	0	0.9813	<	0.45614
module_280	0.913043	0.1555	>	0.00123218	0.089	>	0	0.9878	<	0.586957
module_193	1.27273	<0.001	>	0.00454041	0.004	>	0	0.9965	<	0.431818
module_514	0	0.8976	<	0	0.971	<	0	NA	NA	1
module_203	1.2	0.0001	>	0.00325444	0.0307	>	0	0.9985	<	0.45
module_574	1	0.0013	>	0.0131579	0.41	>	0	0.9997	<	0.5
module_490	0.4	0.974	>	0.000591716	0.8574	>	0	0.9996	<	0.8
module_222	0.72	0.056	>	0.000875912	0.5354	>	0	0.9991	<	0.64
module_357	1.0625	0.0025	>	0.00113724	0.0126	>	0.0729167	0.0721	>	0.53125
module_43	0.0540541	<0.001	<	0	0.0011	<	0	NA	NA	0.972973
module_330	1.24444	0.0001	>	0.0028484	0.0153	>	0	0.985	<	0.444444
module_311	0.666667	0.5397	>	0.00449438	0.2049	>	0	0.9991	<	0.733333
module_315	1.42857	<0.001	>	0.00886525	0.0089	>	0	0.9988	<	0.380952
module_494	0.148148	0.2383	<	0.000114666	0.6341	<	0	0.9998	<	0.925926
module_479	0.590909	0.8364	<	0.000327918	0.7426	<	0.0681818	0.1402	>	0.727273
module_362	0.631579	0.0315	>	0.00104566	0.6726	>	0	0.9994	<	0.684211
module_171	1.33835	0.0002	>	0.00050711	0.049	>	0.037594	0.1511	>	0.43609
module_500	0.434783	0.9595	>	0.000759446	0.922	<	0	0.9996	<	0.782609
module_183	3.00775	<0.001	>	0.0173145	<0.001	>	0.0491694	<0.001	>	0.100775
module_513	0.8	0.044	>	0.05	0.6749	>	0	1	>	0.6
module_337	1.25	0.0371	>	0.00353985	0.0779	>	0	0.9564	<	0.453125
module_416	0.125	0.8717	<	0	0.7537	<	0	NA	NA	0.9375
module_375	1.17073	0.0003	>	0.0132986	<0.001	>	0	0.9914	<	0.426829
module_304	1.42857	0.0051	>	0.00281955	0.8792	>	0.285714	0.0018	>	0.5
module_236	2.14815	<0.001	>	0.00986125	<0.001	>	0	0.9961	<	0.259259
module_562	1.3	0.0001	>	0.0221893	0.0277	>	0.15	0.1884	>	0.45
module_489	0	0.067	<	0	0.5498	<	0	NA	NA	1
module_508	0.210526	0.5981	<	0.000348554	0.8015	<	0	0.9998	<	0.894737
module_47	1.60452	<0.001	>	0.0113802	<0.001	>	0.00973007	0.7467	>	0.305085
module_407	0.2	0.8319	>	0	0.943	<	0	NA	NA	0.9
module_447	0.842105	0.0212	>	0.00808497	0.0539	>	0	0.998	<	0.578947
module_108	1.6	<0.001	>	0.0019137	<0.001	>	0.0261905	0.5005	>	0.3
module_425	0.857143	0.0012	>	0.00253293	0.4135	>	0	0.9992	<	0.571429
module_266	1.33333	<0.001	>	0.0070922	0.0073	>	0	0.9982	<	0.380952
module_65	0.333333	0.3585	>	0	0.9942	<	0	NA	NA	0.833333
module_308	1.42308	0.0001	>	0.00448266	0.0108	>	0.0288462	0.7121	>	0.365385
module_204	2.0597	<0.001	>	0.00360634	0.0002	>	0.0415568	0.0758	>	0.283582
module_366	0.222222	0.6594	<	0.000414594	0.8237	<	0	0.9998	<	0.888889
module_276	1.84615	<0.001	>	0.0033557	0.0001	>	0.153846	0.1676	>	0.307692
module_288	1.24444	<0.001	>	0.00423729	0.0052	>	0	0.9965	<	0.444444
module_0	0	0.9876	<	0	0.9976	<	0	NA	NA	1
module_545	0.823529	0.0482	>	0.0234297	0.0664	>	0	0.999	<	0.588235
module_429	0.571429	0.1669	>	0.0056391	0.8842	>	0	0.9999	<	0.714286
module_68	2.2	<0.001	>	0.135799	<0.001	>	0.105	0.3505	>	0.1
module_412	1.52941	<0.001	>	0.0568295	0.0003	>	0	0.9988	<	0.294118
module_74	0.470588	0.3279	>	0.000997009	0.863	>	0	0.9996	<	0.764706
module_452	0	0.7886	<	0	0.9375	<	0	NA	NA	1
module_437	0	0.8058	<	0	0.943	<	0	NA	NA	1
module_210	1.4359	0.0001	>	0.00314569	0.0001	>	0.0598291	0.4853	>	0.410256
module_353	1.89474	<0.001	>	0.0097595	0.0005	>	0	0.9987	<	0.368421
module_365	0.105263	0.8463	<	0	0.7149	<	0	NA	NA	0.947368
module_493	0.608696	0.8297	<	0.000858124	0.5792	>	0	0.9975	<	0.695652
module_535	0	0.4938	<	0	0.8088	<	0	NA	NA	1
module_373	0	0.5889	<	0	0.8528	<	0	NA	NA	1
module_10	0.933333	0.0021	>	0.00224719	0.3731	>	0	0.9993	<	0.533333
module_149	2.19672	<0.001	>	0.0306913	<0.001	>	0.0327869	0.3609	>	0.163934
module_510	0	0.8784	<	0	0.9654	<	0	NA	NA	1
module_324	1.92553	<0.001	>	0.00279004	<0.001	>	0.0996158	<0.001	>	0.308511
module_152	1.94286	<0.001	>	0.001697	<0.001	>	0.0798942	0.043	>	0.314286
module_505	0	0.8976	<	0	0.971	<	0	NA	NA	1
module_122	1.79006	<0.001	>	0.0137027	<0.001	>	0.0128913	0.9542	>	0.254144
module_161	2.53608	<0.001	>	0.0298919	<0.001	>	0.00506984	0.6712	>	0.134021
module_81	1.42857	<0.001	>	0.0635765	0.0095	>	0	0.9986	<	0.333333
module_432	0	0.8596	<	0	0.9597	<	0	NA	NA	1
module_354	0.285714	0.6919	>	0	0.7805	<	0	NA	NA	0.857143
module_482	0	0.9835	<	0	0.9951	<	0	NA	NA	1
module_370	0.727273	0.0138	>	0.00634249	0.8578	>	0	0.9999	<	0.636364
module_156	1	0.0037	>	0.0041521	0.673	>	0	0.9993	<	0.5
module_305	0	0.2866	<	0	0.7719	<	0	NA	NA	1
module_50	2.83333	<0.001	>	0.0597484	0.0001	>	0.352778	<0.001	>	0.25
module_349	2.56	<0.001	>	0.00510949	<0.001	>	0.154857	0.0013	>	0.32
module_160	2.72727	<0.001	>	0.0085879	<0.001	>	0	0.9956	<	0.272727
module_240	1.1	0.0009	>	0.0056213	0.591	>	0	0.9993	<	0.45
module_463	0	0.0904	<	0	0.5875	<	0	NA	NA	1
module_399	1.89474	<0.001	>	0.0287797	<0.001	>	0.0182122	0.049	>	0.263158
module_271	0.769231	0.4132	>	0.00120192	0.9008	>	0.230769	0.0119	>	0.692308
module_568	0.304348	0.0065	<	0.00112216	0.5114	<	0	0.9986	<	0.847826
module_28	3.75439	<0.001	>	0.0345516	<0.001	>	0.102589	<0.001	>	0.0877193
module_230	1	0.017	>	0.00943396	0.1313	>	0	0.9995	<	0.583333
module_334	1.78744	<0.001	>	0.000646166	<0.001	>	0.0246996	0.3155	>	0.333333
module_273	1.88571	<0.001	>	0.0156814	<0.001	>	0.00904762	0.599	>	0.214286
module_393	0	0.4141	<	0	0.7671	<	0	NA	NA	1
module_405	1.27273	0.0002	>	0.00331758	0.0011	>	0.0570707	0.074	>	0.409091
module_309	2.37736	<0.001	>	0.015793	<0.001	>	0.0958915	<0.001	>	0.216981
module_42	0.6	0.3529	>	0.0117647	0.487	>	0	0.9996	<	0.7
module_79	1.08511	0.6305	>	0.00205501	0.2384	>	0	0.926	<	0.489362
module_442	0	0.0496	<	0	0.5146	<	0	NA	NA	1
module_235	1.17949	0.0541	>	0.000403381	0.1009	<	0.0811966	0.0407	>	0.512821
module_141	0.4	0.7169	>	0.00294118	0.8744	>	0	0.9999	<	0.8
module_99	1.496	0.0216	>	0.00599339	0.005	>	0.00544444	0.9708	<	0.42
module_295	1.04762	0.0282	>	0.00329281	0.2561	>	0.111111	0.0852	>	0.571429
module_387	0.744186	0.0081	>	0.000568536	0.4968	>	0	0.9982	<	0.651163
module_110	2.77419	<0.001	>	0.00938687	<0.001	>	0	0.9956	<	0.258065
module_527	0.352941	0.7226	<	0	0.5684	<	0.176471	0.0026	>	0.882353
module_56	0.4	0.4643	>	0.00294118	0.8785	>	0	0.9999	<	0.8
module_446	0.421053	0.2304	>	0.000348554	0.8894	<	0	0.9998	<	0.789474
module_424	0.4	0.4529	>	0.00224719	0.9318	>	0	0.9999	<	0.8
module_367	0.666667	0.0057	>	0.00240798	0.5338	>	0	0.999	<	0.666667
module_168	0.965517	0.0012	>	0.00110051	0.1189	>	0	0.9982	<	0.551724
module_485	0.344828	0.8943	<	0.000366838	0.8117	<	0	0.9996	<	0.827586
module_443	0.121212	0.1095	<	6.13422e-05	0.5268	<	0	0.9998	<	0.939394
module_26	1.19685	0.0174	>	0.000332043	0.4609	>	0.0175853	0.4972	>	0.464567
module_192	1.43704	0.0005	>	0.000680959	0.1956	>	0	0.9153	<	0.42963
module_546	0	0.8976	<	0	0.971	<	0	NA	NA	1
module_528	0	0.9172	<	0	0.9768	<	0	NA	NA	1
module_338	1.33333	0.0001	>	0.00045847	0.4342	>	0.0869565	0.0797	>	0.405797
module_184	0	0.3916	<	0	0.8235	<	0	NA	NA	1
module_571	0	0.7718	<	0	0.932	<	0	NA	NA	1
module_491	0.415094	0.1114	<	0.000755287	0.665	<	0	0.998	<	0.792453
module_287	0.625	0.5345	>	0.000269978	0.6119	<	0	0.9962	<	0.6875
module_345	1.5935	0.0003	>	0.00239528	0.006	>	0.0617886	0.0445	>	0.406504
module_101	0.857143	0.0711	>	0.010989	0.7546	>	0	0.9998	<	0.571429
module_436	1.35294	0.0844	>	0.00200429	0.0122	>	0.0254902	0.2653	>	0.5
module_517	0	0.8596	<	0	0.9597	<	0	NA	NA	1
module_232	0.869565	0.0237	>	0.00151889	0.1678	>	0	0.9987	<	0.608696
module_556	0.444444	0.8824	>	0.000829187	0.7909	>	0	0.9996	<	0.777778
module_175	1.35294	0.0065	>	0.00158443	0.026	>	0.0220588	0.4315	>	0.426471
module_433	0.878788	0.0127	>	0.000408318	0.1882	>	0	0.9953	<	0.560606
module_275	1.42857	<0.001	>	0.0552178	0.0026	>	0	0.9988	<	0.285714
module_567	0.709677	0.9139	>	0.000705866	0.7186	>	0	0.9966	<	0.66129
module_472	0	0.8596	<	0	0.9597	<	0	NA	NA	1
module_457	0.8	0.0019	>	0.00588235	0.5161	>	0	1	>	0.6
module_454	0.285714	0.4323	>	0	0.9932	<	0	NA	NA	0.857143
module_316	1.55882	0.0001	>	0.00257636	0.0009	>	0.0167017	0.7764	>	0.338235
module_71	0	0.6246	<	0	0.868	<	0	NA	NA	1
module_551	0.526316	0.0707	>	0.00139421	0.877	>	0	0.9997	<	0.736842
module_418	0.809524	0.8168	>	0.000494819	0.4434	>	0	0.9972	<	0.666667
module_261	1.22772	0.1877	>	0.000438221	0.0542	<	0.020462	0.7457	>	0.475248
module_476	0	0.8413	<	0	0.9541	<	0	NA	NA	1
module_392	1.30435	<0.001	>	0.0151889	0.0003	>	0.0362319	0.2297	>	0.434783
module_92	1.11565	0.0676	>	0.00090313	0.0724	<	0	0.9001	<	0.455782
module_417	0.2	0.9177	<	0	0.8379	<	0	NA	NA	0.9
module_209	1.25301	0.0093	>	0.000595331	0.2528	<	0.0514056	0.1429	>	0.457831
module_559	0.2	0.5396	<	0.000295858	0.7794	<	0	0.9998	<	0.9
module_115	2.31373	<0.001	>	0.0459333	<0.001	>	0.0326797	0.5088	>	0.0980392
module_216	1	0.0001	>	0.00471698	0.2875	>	0	0.9999	<	0.5
module_504	1.41667	<0.001	>	0.00481408	0.0019	>	0	0.9987	<	0.5
module_495	0	0.8976	<	0	0.971	<	0	NA	NA	1
module_249	0.8	0.3138	>	0.0035503	0.2177	>	0	0.9989	<	0.65
module_541	0	0.0202	<	0	0.4218	<	0	NA	NA	1
module_497	0	0.3683	<	0	0.7405	<	0	NA	NA	1
module_503	0.69697	0.2553	<	0.000998921	0.2283	<	0	0.969	<	0.651515
module_499	1.73333	<0.001	>	0.0324257	<0.001	>	0.0404762	0.3442	>	0.333333
module_428	0	0.9901	<	0	0.9971	<	0	NA	NA	1
module_200	2.1	<0.001	>	0.00980105	<0.001	>	0.0738889	0.2149	>	0.166667
module_325	0.90566	0.0564	>	0.000513025	0.8513	<	0.0389937	0.2449	>	0.566038
module_331	1.45	0.0005	>	0.000686099	0.4144	>	0.0716667	0.0346	>	0.4125
module_378	1.32812	0.0008	>	0.00442905	0.0012	>	0.00757283	0.7457	>	0.378906
module_558	0.32	0.7922	>	0.000291971	0.7882	<	0	0.9996	<	0.84
module_243	1.28205	0.2205	>	0.000368305	0.1861	>	0.0470085	0.0522	>	0.5
module_348	0.48	0.9219	>	0.00160584	0.5354	>	0	0.9991	<	0.76
module_536	0	0.0235	<	0	0.436	<	0	NA	NA	1
module_406	0.947368	0.0494	>	0.0128805	0.0052	>	0	0.9978	<	0.552632
module_227	0.6	0.3789	>	0.00294118	0.8376	>	0	0.9998	<	0.7
module_253	0.965517	0.0012	>	0.00110051	0.1189	>	0	0.9982	<	0.551724
module_150	2.2	<0.001	>	0.0412541	<0.001	>	0.0888889	0.2467	>	0.166667
module_206	1.18248	0.1384	>	0.000907438	0.007	<	0	0.9315	<	0.50365
module_67	0.896552	0.59	<	0.000961655	0.3776	>	0	0.9194	<	0.560345
module_460	0.666667	0.3889	>	0.00123762	0.3539	>	0	0.9988	<	0.7
module_144	3.5	0.0005	>	0.0408805	0.0193	>	0.429762	<0.001	>	0.25
module_228	0.363636	0.9774	<	0.00211416	0.8605	>	0	0.9998	<	0.818182
module_540	0.6	0.0436	>	0.00294118	0.8785	>	0	0.9999	<	0.7
module_511	0	0.1417	<	0	0.6491	<	0	NA	NA	1
module_34	1.13043	0.0004	>	0.00911335	0.044	>	0.0724638	0.1175	>	0.478261
module_542	0.666667	0.1245	>	0.0128205	0.801	>	0	0.9999	<	0.666667
module_453	0.32	0.943	<	0.000291971	0.8559	<	0	0.9996	<	0.84
module_270	1.42857	<0.001	>	0.0013289	0.185	>	0.142857	0.0243	>	0.457143
module_180	1.63057	<0.001	>	0.00133048	0.1646	>	0.0186837	0.1421	>	0.356688
module_187	1.15789	0.0004	>	0.00662252	0.5419	>	0	0.9993	<	0.421053
module_469	0.4	0.4643	>	0.00294118	0.8785	>	0	0.9999	<	0.8
module_462	0	0.8413	<	0	0.9541	<	0	NA	NA	1
module_157	1.13761	0.03	>	0.00109437	0.279	<	0.0214067	0.715	>	0.458716
module_201	1.51351	0.0012	>	0.00113728	0.006	>	0	0.943	<	0.391892
module_413	0.4	0.2755	>	0	0.9951	<	0	NA	NA	0.8
module_300	2.76471	<0.001	>	0.0211967	<0.001	>	0.0524375	0.0015	>	0.161765
module_131	1.47619	0.0001	>	0.00555944	0.0302	>	0.166667	0.0026	>	0.428571
module_14	1.65217	0.0001	>	0.0058857	0.1142	>	0.2	0.0077	>	0.434783
module_111	1.44	<0.001	>	0.00488993	0.0115	>	0.0209524	0.2847	>	0.371429
module_165	1.53846	0.0005	>	0.00292638	0.0586	>	0.0282051	0.155	>	0.373626
module_306	2.95238	<0.001	>	0.00657818	<0.001	>	0.0515152	0.0383	>	0.238095
module_269	2.22222	<0.001	>	0.0982906	<0.001	>	0	1	>	0.222222
module_259	2.56566	<0.001	>	0.0277921	<0.001	>	0.0575758	0.1232	>	0.161616
module_29	3.86667	<0.001	>	0.0234699	<0.001	>	0	0.9929	<	0.155556
module_121	1.65753	<0.001	>	0.00232029	0.0004	>	0.0392694	0.0461	>	0.308219
module_211	1.09091	0.0021	>	0.0739958	0.0107	>	0	0.9999	<	0.454545
module_369	0	0.9705	<	0	0.9913	<	0	NA	NA	1
module_256	2.43373	0.0006	>	0.00124874	0.005	>	0	0.9364	<	0.39759
module_296	1.37037	<0.001	>	0.000740202	0.0053	>	0	0.9795	<	0.388889
module_466	0	0.9835	<	0	0.9951	<	0	NA	NA	1
module_458	0.1	0.2974	<	0	0.5146	<	0	NA	NA	0.95
module_265	2.14286	<0.001	>	0.0357625	<0.001	>	0.0976616	<0.001	>	0.142857
module_78	0.307692	0.659	>	0.00120192	0.9463	>	0	0.9999	<	0.846154
module_374	0.8	0.0051	>	0.000729927	0.355	>	0	0.999	<	0.6
module_310	0.571429	0.2572	>	0.00093985	0.9166	<	0	0.9998	<	0.714286
module_9	0.909091	0.1603	<	0.00111265	0.0198	<	0.038961	0.2997	>	0.558442
module_523	0.4	0.4643	>	0.00294118	0.8785	>	0	0.9999	<	0.8
module_51	1.75	<0.001	>	0.0138363	<0.001	>	0	0.9959	<	0.275
module_335	1	0.0003	>	0.00471698	0.3141	>	0	0.9996	<	0.5
module_125	3.34328	<0.001	>	0.036509	<0.001	>	0.188024	<0.001	>	0.0746269
module_473	1.2381	<0.001	>	0.00759878	0.0028	>	0	0.9988	<	0.428571
module_404	1	0.0027	>	0.0134462	0.0011	>	0	0.998	<	0.583333
module_320	1.85366	<0.001	>	0.00219449	0.1041	>	0.121951	0.0667	>	0.292683
module_162	0.909091	0.061	>	0.00845666	0.5157	>	0	0.9996	<	0.545455
module_189	1.15152	<0.001	>	0.00134953	0.054	>	0.0707071	0.2486	>	0.484848
module_548	0	0.6246	<	0	0.868	<	0	NA	NA	1
module_361	0.591549	0.0125	<	0.000233477	0.0385	<	0	0.969	<	0.71831
module_279	1.59064	<0.001	>	0.000555765	0.0027	>	0.0175439	0.8416	>	0.374269
module_145	1.74312	<0.001	>	0.00382475	0.0179	>	0.0452196	0.0216	>	0.302752
module_350	1.45205	0.0075	>	0.00168417	0.4606	<	0.10274	0.0128	>	0.410959
module_341	0.823529	0.6706	<	0.000272554	0.1459	<	0.0457516	0.2661	>	0.647059
module_190	1.22222	<0.001	>	0.0157546	0.0224	>	0	0.9991	<	0.444444
module_59	0	0.3473	<	0	0.7276	<	0	NA	NA	1
module_575	0	0.8596	<	0	0.9597	<	0	NA	NA	1
module_564	0.6	0.1738	>	0.0117647	0.4913	>	0	0.9997	<	0.7
module_477	0.484848	0.7954	>	0.00128819	0.5688	>	0	0.999	<	0.757576
module_196	1.0303	0.0001	>	0.00128819	0.054	>	0	0.9978	<	0.515152
module_566	0.571429	0.0527	>	0.0018797	0.7168	>	0	0.9997	<	0.714286
module_533	0.97561	<0.001	>	0.0020064	0.0841	>	0	0.9978	<	0.512195
module_470	0	0.7886	<	0	0.9375	<	0	NA	NA	1
module_344	3.09639	<0.001	>	0.013279	<0.001	>	0.0256619	0.0021	>	0.126506
module_444	0.352941	0.2935	>	0.000498504	0.9453	<	0	0.9999	<	0.823529
module_257	1.70103	<0.001	>	0.00262351	0.0002	>	0.0223736	0.0299	>	0.350515
module_502	1.0566	<0.001	>	0.0010118	0.0007	>	0	0.9961	<	0.528302
module_30	0.444444	0.9494	>	0.0042735	0.8126	>	0	0.9998	<	0.777778
module_529	0.378378	0.1338	<	0.00077466	0.5784	<	0	0.9989	<	0.810811
module_219	2.05882	<0.001	>	0.00849922	<0.001	>	0.0745098	0.0105	>	0.352941
module_560	0.5	0.3092	>	0.00657895	0.8207	>	0	0.9999	<	0.75
module_302	3.01136	<0.001	>	0.0130197	<0.001	>	0.0241091	0.0028	>	0.130682
module_572	1.71429	<0.001	>	0.0169173	<0.001	>	0.119048	0.1951	>	0.357143
module_549	0.428571	0.8835	>	0.000307	0.7933	<	0	0.9994	<	0.785714
module_538	0.5	0.1679	>	0.00657895	0.8153	>	0	1	>	0.75
module_421	0.222222	0.9964	<	0.000414594	0.904	<	0	0.9998	<	0.888889
module_260	0.666667	0.1531	>	0	0.9857	<	0	NA	NA	0.666667
module_4	1.30435	<0.001	>	0.00911335	0.0078	>	0	0.9982	<	0.347826
module_102	1.7931	<0.001	>	0.00495231	<0.001	>	0.0942529	0.011	>	0.37931
module_293	3	<0.001	>	0.0115291	0.0002	>	0.329762	0.0004	>	0.3125
module_77	0.615385	0.1129	>	0.00480769	0.6362	>	0	0.9996	<	0.692308
module_234	1.45161	0.0013	>	0.00130585	0.0854	>	0.0725806	0.1008	>	0.387097
module_465	0.4	0.4643	>	0.00294118	0.8785	>	0	0.9999	<	0.8
module_340	4.03509	<0.001	>	0.00764264	<0.001	>	0.192398	0.0002	>	0.192982
module_516	0	0.7553	<	0	0.9265	<	0	NA	NA	1
module_555	0.727273	0.0673	>	0.0211416	0.2129	>	0	0.9996	<	0.636364
module_507	2.82927	<0.001	>	0.0136372	0.0001	>	0	0.9947	<	0.439024
module_449	0	0.0368	<	0	0.4816	<	0	NA	NA	1
module_167	1.58929	<0.001	>	0.000430116	0.0107	>	0.0446429	0.41	>	0.303571
module_332	1.45455	<0.001	>	0.000882259	0.0236	>	0.0328283	0.6689	>	0.348485
module_106	1	0.0685	>	0.25	0.6067	>	0	0.9999	<	0.5
module_386	0.347826	0.9695	<	0.000379723	0.8897	<	0	0.9996	<	0.826087
module_153	1.67442	<0.001	>	0.00276146	<0.001	>	0	0.9777	<	0.325581
module_339	1.05882	0.0005	>	0.000726907	0.2521	>	0	0.9915	<	0.5
module_552	0.470588	0.3279	>	0.000997009	0.863	>	0	0.9996	<	0.764706
module_522	0.434783	0.7805	>	0.000379723	0.8897	<	0	0.9996	<	0.782609
module_135	0.444444	0.9494	>	0.0042735	0.8126	>	0	0.9998	<	0.777778
module_382	1.10345	<0.001	>	0.00339325	0.2301	>	0	0.9986	<	0.448276
module_182	1.61062	0.0011	>	0.00156512	0.0328	>	0.0589971	0.0996	>	0.389381
module_208	1.31034	0.0205	>	0.000380189	0.3809	>	0.0655172	0.0171	>	0.482759
module_264	1	0.0113	>	0.00657895	0.0707	>	0	0.9993	<	0.571429
module_282	2.18605	<0.001	>	0.00966511	<0.001	>	0.116279	0.1683	>	0.232558
module_481	1.68421	0.0058	>	0.0013118	0.2069	>	0	0.9953	<	0.684211
module_409	0.421053	0.2304	>	0.000348554	0.8894	<	0	0.9998	<	0.789474
module_323	1.41667	0.1092	>	0.000385958	0.0253	>	0	0.948	<	0.472222
module_233	1.24138	<0.001	>	0.00165077	0.0516	>	0	0.998	<	0.413793
module_484	0.709677	0.1434	>	0.00230947	0.0994	>	0	0.9984	<	0.645161
module_254	3.17355	<0.001	>	0.0275814	<0.001	>	0.110794	<0.001	>	0.206612
module_410	0.571429	0.369	>	0.000759878	0.6571	>	0	0.9994	<	0.714286
module_355	3.64179	<0.001	>	0.0371846	<0.001	>	0.061476	0.0007	>	0.0746269
module_242	2.10484	<0.001	>	0.000124635	0.0036	>	0.0632808	0.0017	>	0.395161
module_547	0	0.8976	<	0	0.971	<	0	NA	NA	1
module_290	1.45	<0.001	>	0.00108254	0.0003	>	0	0.9963	<	0.35
module_328	1	<0.001	>	0.00242718	0.2495	>	0	0.9995	<	0.5
module_139	1.78333	<0.001	>	0.00605974	0.0005	>	0.005	0.8971	>	0.283333
module_468	0.54902	0.4328	<	0.000112228	0.306	<	0	0.9986	<	0.72549
module_237	1.40625	0.0017	>	0.00439678	0.0274	>	0.0572917	0.0305	>	0.359375
module_396	0	0.8596	<	0	0.9597	<	0	NA	NA	1
module_134	0.785714	0.0086	>	0.00112567	0.4301	>	0	0.9989	<	0.607143
module_274	1.73684	<0.001	>	0.0121443	<0.001	>	0.0113548	0.5455	>	0.254386
module_87	1.09804	<0.001	>	0.0101166	0.0008	>	0	0.9966	<	0.45098
module_488	1.05556	<0.001	>	0.00351321	0.0287	>	0	0.9978	<	0.472222
module_322	1.44444	0.0001	>	0.000448532	0.049	>	0.02	0.5033	>	0.411111
module_524	0.967742	<0.001	>	0.0131863	0.0425	>	0	0.9982	<	0.516129
module_496	1.42857	0.0001	>	0.186813	0.0774	>	0	1	>	0.285714
module_250	1.53623	0.0001	>	0.00246428	0.0012	>	0.0164596	0.7764	>	0.347826
module_318	1.70732	<0.001	>	0.0310678	<0.001	>	0.0861789	0.0018	>	0.341463
module_368	0.5	0.3092	>	0.00657895	0.8207	>	0	0.9999	<	0.75
module_195	2.10891	<0.001	>	0.00147914	<0.001	>	0.0325579	0.0469	>	0.247525
module_519	0.5	0.0961	>	0.00157233	0.9286	>	0	0.9999	<	0.75
module_96	0.666667	0.0873	>	0.000664011	0.5394	>	0	0.9992	<	0.666667
module_278	1.83673	<0.001	>	0.00230181	0.0002	>	0.071137	0.0534	>	0.387755
module_138	1.19588	<0.001	>	0.00128696	0.1278	<	0.0360825	0.1101	>	0.42268
module_247	0.818182	0.6498	>	0.00174825	0.2093	>	0	0.9943	<	0.636364
module_347	0.285714	0.6407	>	0	0.9669	<	0	NA	NA	0.857143
module_530	0	0.8233	<	0	0.9485	<	0	NA	NA	1
module_143	2.94118	<0.001	>	0.0139581	0.0003	>	0.303361	0.0004	>	0.294118
module_174	1.01852	0.0219	>	0.000169865	0.0073	<	0.0277778	0.5592	>	0.509259
module_427	0.542857	0.0007	<	0.000127986	0.0145	<	0	0.9784	<	0.757143
module_93	0.630435	0.0166	<	0.000520507	0.0085	<	0	0.969	<	0.684783
module_439	0.588235	0.3279	>	0.00847458	0.4311	>	0	0.9994	<	0.705882
module_379	1.25676	0.3115	>	0.000154293	0.0003	<	0.0236486	0.4745	>	0.621622
module_377	0	0.8784	<	0	0.9654	<	0	NA	NA	1
module_537	1.21739	<0.001	>	0.00626543	0.0013	>	0	0.9987	<	0.478261
module_440	0.428571	0.3822	>	0.00093985	0.9536	<	0	0.9998	<	0.785714
module_512	0.580645	0.2727	>	0.00134098	0.7259	>	0	0.9992	<	0.709677
module_82	1.28	<0.001	>	0.00890511	0.0157	>	0	0.9982	<	0.36
module_109	0.88	0.283	>	0.000437956	0.483	<	0.213333	<0.001	>	0.64
module_229	1.4	<0.001	>	0.00142084	0.0012	>	0.116667	0.0289	>	0.475
module_461	0.390244	0.0542	<	0.000282149	0.6523	<	0	0.9986	<	0.829268
module_97	1	0.1119	>	0.00604456	0.0027	>	0	0.9942	<	0.515152
module_35	2.86667	<0.001	>	0.0106436	<0.001	>	0	0.9959	<	0.266667
module_215	0.4	0.7169	>	0.00294118	0.8744	>	0	0.9999	<	0.8
module_474	0.875	0.0002	>	0.00667476	0.2456	>	0	0.9995	<	0.5625
module_455	0.5	0.6156	>	0.000498008	0.7808	>	0	0.9994	<	0.75
module_128	1.52381	<0.001	>	0.000852242	0.0044	>	0.0648148	0.0459	>	0.373016
module_403	2.30435	<0.001	>	0.02779	<0.001	>	0.139455	<0.001	>	0.217391
module_58	0.545455	0.1723	>	0.00211416	0.9239	>	0	0.9998	<	0.727273
module_563	0.307692	0.659	>	0.00120192	0.9463	>	0	0.9999	<	0.846154
module_351	2.03774	<0.001	>	0.00581428	<0.001	>	0.0339623	0.4305	>	0.283019
module_63	1.94924	<0.001	>	0.00722157	<0.001	>	0.00497945	0.8672	>	0.263959
module_268	0.8	0.0253	>	0.00588235	0.5162	>	0	0.9997	<	0.6
module_298	2.58065	<0.001	>	0.0333755	<0.001	>	0.0666667	0.523	>	0.16129
module_297	1.37778	0.0001	>	0.000965196	0.0172	>	0.0574074	0.2622	>	0.4
module_359	0.4	0.4643	>	0.00294118	0.8785	>	0	0.9999	<	0.8
module_360	0	0.8233	<	0	0.9485	<	0	NA	NA	1
module_573	1.13043	0.0036	>	0.00645529	0.0514	>	0	0.9984	<	0.565217
module_221	0	0.335	<	0	0.7973	<	0	NA	NA	1
module_430	0.611111	0.2339	>	0.000936856	0.6058	>	0	0.9988	<	0.694444
module_124	2.65169	<0.001	>	0.00918558	<0.001	>	0.0371778	0.0004	>	0.168539
module_90	0.75	0.0012	>	0.00182039	0.5007	>	0	0.9996	<	0.625
module_202	1.95918	0.0001	>	0.00387864	<0.001	>	0	0.9513	<	0.265306
module_48	1.18343	0.0357	>	0.00207729	0.3365	<	0.00986193	0.8366	>	0.426036
module_103	0	0.9332	<	0	0.9857	<	0	NA	NA	1
module_148	1.16667	0.0028	>	0.0110063	0.0348	>	0	0.9993	<	0.5
module_371	0.666667	0.0566	>	0.00780212	0.2191	>	0	0.999	<	0.666667
module_356	1	0.6346	<	0.00146737	0.5962	<	0.0208333	0.7396	>	0.517857
module_314	0.7	0.9083	>	0.00177515	0.5345	>	0	0.9962	<	0.7
module_435	0.64	0.0471	<	0.000276646	0.0633	<	0	0.969	<	0.693333
module_414	0.75	0.0067	>	0.00667476	0.2456	>	0	0.9995	<	0.625
module_185	0.571429	0.2361	>	0.010989	0.7656	>	0	1	<	0.714286
module_191	1.13043	0.0004	>	0.00911335	0.044	>	0.0724638	0.1175	>	0.478261
module_281	2.15385	<0.001	>	0.0108768	<0.001	>	0.169231	<0.001	>	0.365385
module_199	2.82051	<0.001	>	0.0212919	<0.001	>	0.0652625	0.0149	>	0.145299
module_464	0	0.9372	<	0	0.9825	<	0	NA	NA	1
module_245	1.90909	<0.001	>	0.0294622	<0.001	>	0	0.9946	<	0.227273
module_158	3.16667	<0.001	>	0.0368539	<0.001	>	0.197976	<0.001	>	0.0833333
module_478	0.235294	0.8368	>	0.000498504	0.9453	<	0	0.9999	<	0.882353
module_120	1.21348	0.004	>	0.0014948	0.3303	>	0	0.9463	<	0.438202
module_170	1.51181	<0.001	>	0.000832107	0.0054	>	0.0643045	0.0459	>	0.377953
module_283	1.76471	<0.001	>	0.0343968	0.1292	>	0.176471	0.1163	>	0.235294
module_459	1.30677	0.002	>	0.00459493	0.0009	>	0.00772368	0.7256	>	0.390438
module_411	0.117647	0.001	<	5.59159e-05	0.1585	<	0	0.9997	<	0.941176
module_225	1	0.0003	>	0.00628931	0.6399	>	0	0.9997	<	0.5
module_194	0	0.8393	<	0	0.9482	<	0	NA	NA	1
module_543	1.17647	0.0005	>	0.00448654	0.0174	>	0	0.9986	<	0.529412
module_173	1.25	0.0008	>	0.00199203	0.0012	>	0	0.9976	<	0.5
module_398	0.411765	0.9596	<	0.00027958	0.8484	<	0	0.9994	<	0.794118
module_384	0.666667	0.0195	>	0.00299625	0.7544	>	0	0.9997	<	0.666667
module_20	1.20879	0.1953	>	0.00255852	0.314	>	0.0384615	0.4407	>	0.472527
module_130	0.875	0.0725	>	0.00182039	0.4552	>	0	0.9972	<	0.5625
module_285	1.16279	0.0649	>	0.000703901	0.4938	>	0	0.977	<	0.465116
module_301	1.21667	0.0153	>	0.0012668	0.1709	>	0.00833333	0.7657	>	0.45
module_169	1.48148	0.001	>	0.00437565	0.0411	>	0.0277778	0.7182	>	0.37963
module_450	0.571429	0.1221	>	0.010989	0.776	>	0	1	>	0.714286
module_49	1.06122	0.7914	>	0.000637655	0.1574	<	0	0.8959	<	0.517007
module_565	0.190476	0.4847	<	0.000253293	0.7575	<	0	0.9998	<	0.904762
module_263	1.61538	<0.001	>	0.0113904	<0.001	>	0.0339744	0.3564	>	0.307692
module_467	0	0.9835	<	0	0.9951	<	0	NA	NA	1
module_177	1.76	<0.001	>	0.00461176	<0.001	>	0.0279683	0.1792	>	0.28
module_471	0	0.9901	<	0	0.9971	<	0	NA	NA	1
module_223	2.04673	<0.001	>	0.00237164	<0.001	>	0.0640298	<0.001	>	0.257009
module_336	1.94444	<0.001	>	0.0211729	<0.001	>	0.0962963	0.0018	>	0.25
module_515	0.666667	0.9266	<	0.000565245	0.7343	>	0	0.9969	<	0.685185
module_420	0.235294	0.9985	<	0.000498504	0.9133	<	0	0.9998	<	0.882353
module_155	1.90909	<0.001	>	0.0288568	<0.001	>	0	0.9946	<	0.227273
module_107	1.38462	0.0041	>	0.000561226	0.4526	>	0.0662393	0.1568	>	0.435897
module_448	0.285714	0.4847	<	0	0.4978	<	0.142857	0.0026	>	0.904762
module_431	0	0.8058	<	0	0.943	<	0	NA	NA	1
module_400	0	0.8058	<	0	0.943	<	0	NA	NA	1
module_289	1.58042	<0.001	>	0.00579688	0.0001	>	0	0.8873	<	0.293706
module_39	0	0.8784	<	0	0.9654	<	0	NA	NA	1
module_385	1	<0.001	>	0.010745	0.0923	>	0	0.9984	<	0.5
module_312	3.27273	<0.001	>	0.0307495	<0.001	>	0.125357	<0.001	>	0.191919
module_445	0.2	0.8319	>	0	0.943	<	0	NA	NA	0.9
module_390	0.5	0.1679	>	0.00657895	0.8153	>	0	1	>	0.75
module_186	0.4	0.9893	<	0.00294118	0.8376	>	0	0.9998	<	0.8
module_126	2.9249	<0.001	>	0.00607059	<0.001	>	0.0593916	<0.001	>	0.181818
module_303	2.18667	<0.001	>	0.0079585	<0.001	>	0	0.9513	<	0.146667
module_113	1.36923	<0.001	>	0.000614154	0.0697	>	0.0358974	0.3728	>	0.376923
module_251	0.857143	0.0058	>	0.010989	0.7656	>	0	1	<	0.571429
module_534	0.333333	0.8631	>	0.00157233	0.9466	>	0	0.9998	<	0.833333
module_509	0.333333	0.6001	>	0.00157233	0.9286	>	0	0.9999	<	0.833333
module_267	1.06667	0.0003	>	0.00299625	0.1583	>	0	0.9991	<	0.466667
module_451	0.83871	0.0663	>	0.00365045	0.1144	>	0.0537634	0.1479	>	0.612903
module_80	1.51515	<0.001	>	0.0123298	0.0001	>	0	0.9972	<	0.30303
module_343	1.45455	0.0037	>	0.00502622	0.0265	>	0.106061	0.1842	>	0.5
module_487	0.307692	0.659	>	0.00120192	0.9463	>	0	0.9999	<	0.846154
module_408	0	0.8058	<	0	0.943	<	0	NA	NA	1
module_238	1.33333	0.0001	>	0.00144243	0.0358	>	0.00724638	0.8326	>	0.398551
module_166	2.58537	<0.001	>	0.00148014	0.0001	>	0	0.9298	<	0.341463
module_61	1.125	<0.001	>	0.00683503	0.005	>	0	0.9968	<	0.458333
module_561	0.380952	0.5798	>	0.000506586	0.8604	<	0	0.9996	<	0.809524
module_188	1.78723	<0.001	>	0.00760982	0.0003	>	0.02379	0.0819	>	0.269504
module_554	0.363636	0.8189	<	0.000218531	0.736	<	0	0.9998	<	0.818182
module_526	1.08772	0.0371	>	0.00685557	0.1239	>	0	0.9966	<	0.473684
module_258	0.894737	0.0908	>	0.0013475	0.6107	>	0	0.9934	<	0.552632
module_31	2.33333	0.0006	>	0.0235849	0.1164	>	0.333333	0.001	>	0.416667
module_570	0.117647	0.9596	<	0	0.9051	<	0	NA	NA	0.941176
module_381	0.571429	0.0527	>	0.0018797	0.7168	>	0	0.9997	<	0.714286
module_205	1.4876	<0.001	>	0.000518422	0.3406	>	0.00964187	0.9375	>	0.347107
module_54	2.47699	<0.001	>	0.01129	<0.001	>	0.0582988	0.0001	>	0.221757
module_532	1.28631	0.0045	>	0.00442834	0.0019	>	0.00224492	0.9743	>	0.39834
module_422	0	0.8784	<	0	0.9654	<	0	NA	NA	1
module_307	0.25	0.7846	<	0	0.7719	<	0	NA	NA	0.875
module_172	1.34783	0.0073	>	0.000685157	0.3091	<	0.0561594	0.2037	>	0.445652
module_277	1.31148	0.0204	>	0.000815963	0.1931	<	0.0819672	0.0917	>	0.459016
module_415	0	0.8233	<	0	0.9485	<	0	NA	NA	1
module_226	1.1	0.0209	>	0.00121786	0.4189	>	0.125	0.0177	>	0.6
module_539	0	0.8233	<	0	0.9485	<	0	NA	NA	1
module_164	1.45238	0.0072	>	0.00477451	0.0062	>	0	0.938	<	0.392857
module_483	0.333333	0.6001	>	0.00157233	0.9286	>	0	0.9999	<	0.833333
module_291	1.02778	0.1741	>	0.000481049	0.285	<	0.0416667	0.4515	>	0.513889
module_313	0.833333	0.1096	>	0.00628931	0.5586	>	0	0.9996	<	0.583333
module_438	1.23529	<0.001	>	0.00159774	0.0006	>	0	0.9928	<	0.397059
module_133	3.1875	<0.001	>	0.0428591	<0.001	>	0.0354911	0.5402	>	0.1875
module_395	0.4	0.4643	>	0.00294118	0.8785	>	0	0.9999	<	0.8
module_86	1.24	<0.001	>	0.0338842	<0.001	>	0	0.9959	<	0.44
module_376	0.666667	0.0798	>	0.0208333	0.7247	>	0	1	>	0.666667
module_326	0.923077	0.03	>	0.00721154	0.1678	>	0	0.9995	<	0.615385
module_372	0	0.5236	<	0	0.8232	<	0	NA	NA	1
module_426	0.297872	0.0278	<	0.000102984	0.2036	<	0	0.9992	<	0.851064
module_207	1.38356	<0.001	>	0.000541357	0.0835	>	0	0.9027	<	0.383562
module_397	0.666667	0.1049	<	0.000293767	0.0229	<	0	0.9667	<	0.666667
module_22	0.88	0.283	>	0.00233577	0.18	>	0	0.9934	<	0.6
module_248	2.66351	<0.001	>	0.00590932	<0.001	>	0.0421409	0.0001	>	0.189573
module_246	1.125	0.1319	>	0.00485437	0.0359	>	0	0.9987	<	0.625
module_569	0.526316	0.7148	>	0.00139421	0.8268	>	0	0.9996	<	0.736842
module_25	0.8	0.0253	>	0.00588235	0.5162	>	0	0.9997	<	0.6
module_358	0.318182	0.0111	<	0.00118555	0.5657	<	0	0.9986	<	0.840909
module_57	5.07042	<0.001	>	0.0262778	<0.001	>	0.179554	<0.001	>	0.028169
module_531	0.222222	0.4244	<	0.000343997	0.6341	<	0	0.9998	<	0.888889
module_321	2.03409	<0.001	>	0.00587702	<0.001	>	0.0706484	0.0108	>	0.261364
module_553	0	0.6782	<	0	0.8998	<	0	NA	NA	1
module_364	0.363636	0.5351	>	0.00211416	0.9032	>	0	0.9999	<	0.818182
module_389	0.516129	0.0025	<	5.3969e-05	0.0007	<	0	0.9714	<	0.741935
module_241	1.06024	0.0321	>	0.000330336	0.1113	<	0.0361446	0.5025	>	0.493976
module_544	1.71429	0.0052	>	0.00138474	0.1809	>	0	0.9953	<	0.678571
module_176	1.30544	<0.001	>	0.000213797	0.2206	>	0	0.859	<	0.430962
module_327	0.875	0.2119	>	0.00424757	0.095	>	0	0.9989	<	0.625
module_333	1.03704	0.0001	>	0.00114666	0.0768	>	0	0.9982	<	0.518519
module_363	0.133333	0.1625	<	8.25083e-05	0.5783	<	0	0.9998	<	0.933333
module_456	1.26829	0.2035	>	0.0100371	0.0003	>	0.0471545	0.0397	>	0.47561
module_140	0	0.8913	<	0	0.9763	<	0	NA	NA	1
module_319	1.39024	0.1713	>	0.000278703	0.0857	>	0.0378049	0.1543	>	0.5
module_62	1.15556	0.0001	>	0.00348399	0.0052	>	0	0.9955	<	0.422222
module_40	0.363636	0.1109	<	0.000454041	0.3922	<	0	0.9989	<	0.818182
module_36	0.820513	0.3282	<	0.000766513	0.2889	<	0	0.9371	<	0.598291
module_76	1.09091	0.0001	>	0.00134977	0.0747	>	0	0.9936	<	0.467532
module_214	0.965517	<0.001	>	0.000641966	0.1425	>	0	0.9985	<	0.517241
module_73	1.78571	<0.001	>	0.0817642	<0.001	>	0.0690476	0.0479	>	0.214286
module_142	2.7	<0.001	>	0.0872781	<0.001	>	0	0.9981	<	0.1
module_394	0	0.9901	<	0	0.9971	<	0	NA	NA	1
module_159	2.57895	<0.001	>	0.0157557	<0.001	>	0.0245755	0.1276	>	0.138158
module_518	0.545455	0.0673	>	0.00211416	0.9032	>	0	0.9999	<	0.727273
module_492	0	0.8976	<	0	0.971	<	0	NA	NA	1
module_352	2.55556	<0.001	>	0.0178471	<0.001	>	0.088955	0.0001	>	0.194444
module_119	1.80899	<0.001	>	0.0017333	0.0029	>	0.0588015	0.0205	>	0.325843
module_480	0.561404	0.5276	<	0.000193918	0.5064	<	0	0.9978	<	0.754386
module_402	0	0.9372	<	0	0.9825	<	0	NA	NA	1
module_218	0.909091	0.061	>	0.00845666	0.5157	>	0	0.9996	<	0.545455
module_272	0.75	0.037	>	0.00657895	0.8004	>	0	0.9999	<	0.625
module_391	0.333333	0.3585	>	0	0.9942	<	0	NA	NA	0.833333
module_299	3.19355	<0.001	>	0.0342433	<0.001	>	0.068617	0.0003	>	0.112903
module_154	1.21429	0.0008	>	0.000826088	0.1944	>	0.0615079	0.1802	>	0.428571
module_576	0.646154	0.0762	<	0.00103888	0.1631	<	0	0.9714	<	0.676923
module_419	1	0.0013	>	0.0164393	0.012	>	0	0.998	<	0.5
module_294	0.285714	0.8088	<	0	0.7973	<	0	NA	NA	0.857143
module_286	1.38462	0.0014	>	0.00406013	0.0028	>	0.0384615	0.1843	>	0.435897
module_89	0.363636	0.5351	>	0.00211416	0.9032	>	0	0.9999	<	0.818182
module_70	0.473684	0.5117	>	0.000198161	0.7609	<	0	0.9994	<	0.763158
module_217	1.2	0.0009	>	0.00262103	0.0082	>	0	0.9813	<	0.472727
module_147	1.93464	<0.001	>	0.0019527	<0.001	>	0.0228758	0.7577	>	0.24183
module_557	0	0.8596	<	0	0.9597	<	0	NA	NA	1
module_434	0	0.3275	<	0	0.7149	<	0	NA	NA	1
module_506	0.392157	0.162	<	0.000208424	0.5511	<	0	0.9983	<	0.803922
module_346	0.666667	0.3506	>	0.00449438	0.881	>	0	0.9998	<	0.666667
module_7	1.43396	0.0695	>	0.00129034	0.0589	>	0.0127358	0.7735	>	0.433962
module_525	0.3125	0.0444	<	0.00114741	0.5248	<	0	0.9992	<	0.84375
module_388	1.6	<0.001	>	0.0636095	0.0001	>	0.125	0.0702	>	0.35
module_213	1.05769	0.0485	>	0.000228894	0.014	<	0.0288462	0.5322	>	0.5
module_521	0.181818	0.371	<	6.13422e-05	0.5268	<	0	0.9998	<	0.909091
module_501	0	0.7886	<	0	0.9375	<	0	NA	NA	1
module_127	1.08571	<0.001	>	0.00112446	0.0825	>	0.0666667	0.2486	>	0.514286
